# Supplementary material
Source: publisher figshare collection journal article supplement (https://acs.figshare.com/ndownloader/files/4695940)
Supplement: Supplementary file 1 [file 4695940]

 
data_sad 
 
_audit_creation_method            SHELXL-97 
_chemical_name_systematic 
; 
 ? 
; 
_chemical_name_common             ? 
_chemical_melting_point           ? 
_chemical_formula_moiety          ? 
_chemical_formula_sum 
 'C144 H187 N36 Ni4 O171 P3 W36' 
_chemical_formula_weight          12104.65 
 
loop_ 
 _atom_type_symbol 
 _atom_type_description 
 _atom_type_scat_dispersion_real 
 _atom_type_scat_dispersion_imag 
 _atom_type_scat_source 
 'C'  'C'   0.0033   0.0016 
 'International Tables Vol C Tables 4.2.6.8 and 6.1.1.4' 
 'H'  'H'   0.0000   0.0000 
 'International Tables Vol C Tables 4.2.6.8 and 6.1.1.4' 
 'N'  'N'   0.0061   0.0033 
 'International Tables Vol C Tables 4.2.6.8 and 6.1.1.4' 
 'O'  'O'   0.0106   0.0060 
 'International Tables Vol C Tables 4.2.6.8 and 6.1.1.4' 
 'P'  'P'   0.1023   0.0942 
 'International Tables Vol C Tables 4.2.6.8 and 6.1.1.4' 
 'Ni'  'Ni'   0.3393   1.1124 
 'International Tables Vol C Tables 4.2.6.8 and 6.1.1.4' 
 'W'  'W'  -0.8490   6.8722 
 'International Tables Vol C Tables 4.2.6.8 and 6.1.1.4' 
 
_symmetry_cell_setting           'Cubic'
_symmetry_space_group_name_H-M   'Im-3  '
 
loop_ 
 _symmetry_equiv_pos_as_xyz 
 'x, y, z' 
 '-x, -y, z' 
 '-x, y, -z' 
 'x, -y, -z' 
 'z, x, y' 
 'z, -x, -y' 
 '-z, -x, y' 
 '-z, x, -y' 
 'y, z, x' 
 '-y, z, -x' 
 'y, -z, -x' 
 '-y, -z, x' 
 'x+1/2, y+1/2, z+1/2' 
 '-x+1/2, -y+1/2, z+1/2' 
 '-x+1/2, y+1/2, -z+1/2' 
 'x+1/2, -y+1/2, -z+1/2' 
 'z+1/2, x+1/2, y+1/2' 
 'z+1/2, -x+1/2, -y+1/2' 
 '-z+1/2, -x+1/2, y+1/2' 
 '-z+1/2, x+1/2, -y+1/2' 
 'y+1/2, z+1/2, x+1/2' 
 '-y+1/2, z+1/2, -x+1/2' 
 'y+1/2, -z+1/2, -x+1/2' 
 '-y+1/2, -z+1/2, x+1/2' 
 '-x, -y, -z' 
 'x, y, -z' 
 'x, -y, z' 
 '-x, y, z' 
 '-z, -x, -y' 
 '-z, x, y' 
 'z, x, -y' 
 'z, -x, y' 
 '-y, -z, -x' 
 'y, -z, x' 
 '-y, z, x' 
 'y, z, -x' 
 '-x+1/2, -y+1/2, -z+1/2' 
 'x+1/2, y+1/2, -z+1/2' 
 'x+1/2, -y+1/2, z+1/2' 
 '-x+1/2, y+1/2, z+1/2' 
 '-z+1/2, -x+1/2, -y+1/2' 
 '-z+1/2, x+1/2, y+1/2' 
 'z+1/2, x+1/2, -y+1/2' 
 'z+1/2, -x+1/2, y+1/2' 
 '-y+1/2, -z+1/2, -x+1/2' 
 'y+1/2, -z+1/2, x+1/2' 
 '-y+1/2, z+1/2, x+1/2' 
 'y+1/2, z+1/2, -x+1/2' 
 
_cell_length_a                    23.1330(11) 
_cell_length_b                    23.1330(11) 
_cell_length_c                    23.1330(11) 
_cell_angle_alpha                 90.00 
_cell_angle_beta                  90.00 
_cell_angle_gamma                 90.00 
_cell_volume                      12379.3(10) 
_cell_formula_units_Z             2 
_cell_measurement_temperature     293(2) 
_cell_measurement_reflns_used     5704 
_cell_measurement_theta_min       2.228.45 
_cell_measurement_theta_max       ? 
 
_exptl_crystal_description        block 
_exptl_crystal_colour             dark-red 
_exptl_crystal_size_max           0.15 
_exptl_crystal_size_mid           0.10 
_exptl_crystal_size_min           0.10 
_exptl_crystal_density_meas       ? 
_exptl_crystal_density_diffrn     3.247 
_exptl_crystal_density_method     'not measured' 
_exptl_crystal_F_000              10984 
_exptl_absorpt_coefficient_mu     17.079 

_exptl_absorpt_correction_type    'multi-scan' 
_exptl_absorpt_correction_T_min   0.17
_exptl_absorpt_correction_T_max   0.46
_exptl_absorpt_process_details    'Crystal Faces, Bruker(2005)'
 
_exptl_special_details 
; 
 ? 
; 
 
_diffrn_ambient_temperature       293(2) 
_diffrn_radiation_wavelength      0.71073 
_diffrn_radiation_type            MoK\a 
_diffrn_radiation_source          'fine-focus sealed tube' 
_diffrn_radiation_monochromator   graphite 
_diffrn_measurement_device_type  'CCD area detector'
_diffrn_measurement_method       'phi and omega scans'
_diffrn_reflns_number             31414 
_diffrn_reflns_av_R_equivalents   0.1031 
_diffrn_reflns_av_sigmaI/netI     0.0789 
_diffrn_reflns_limit_h_min        -27 
_diffrn_reflns_limit_h_max        27 
_diffrn_reflns_limit_k_min        -27 
_diffrn_reflns_limit_k_max        22 
_diffrn_reflns_limit_l_min        -27 
_diffrn_reflns_limit_l_max        22 
_diffrn_reflns_theta_min          1.76 
_diffrn_reflns_theta_max          24.98 
_reflns_number_total              1976 
_reflns_number_gt                 1610 
_reflns_threshold_expression      >2sigma(I) 
 
_computing_data_collection      'Bruker SMART'
_computing_cell_refinement      'Bruker SMART'
_computing_data_reduction       'Bruker SAINT'
_computing_structure_solution   'Bruker SHELXTL'
_computing_structure_refinement 'Bruker SHELXTL'
_computing_molecular_graphics   'Bruker SHELXTL'
_computing_publication_material 'Bruker SHELXTL
 
_refine_special_details 
; 
 Refinement of F^2^ against ALL reflections.  The weighted R-factor wR and 
 goodness of fit S are based on F^2^, conventional R-factors R are based 
 on F, with F set to zero for negative F^2^. The threshold expression of 
 F^2^ > 2sigma(F^2^) is used only for calculating R-factors(gt) etc. and is 
 not relevant to the choice of reflections for refinement.  R-factors based 
 on F^2^ are statistically about twice as large as those based on F, and R- 
 factors based on ALL data will be even larger. 
; 
 
_refine_ls_structure_factor_coef  Fsqd  
_refine_ls_matrix_type            full 
_refine_ls_weighting_scheme       calc  
_refine_ls_weighting_details 
 'calc w=1/[\s^2^(Fo^2^)+(0.1800P)^2^+0.0000P] where P=(Fo^2^+2Fc^2^)/3' 
_atom_sites_solution_primary      direct 
_atom_sites_solution_secondary    difmap 
_atom_sites_solution_hydrogens    geom 
_refine_ls_hydrogen_treatment     mixed 
_refine_ls_extinction_method      none 
_refine_ls_extinction_coef        ? 
_refine_ls_number_reflns          2553 
_refine_ls_number_parameters      169 
_refine_ls_number_restraints      246 
_refine_ls_R_factor_all           0.0940 
_refine_ls_R_factor_gt            0.0743 
_refine_ls_wR_factor_ref          0.2498 
_refine_ls_wR_factor_gt           0.2362 
_refine_ls_goodness_of_fit_ref    1.020 
_refine_ls_restrained_S_all       0.989 
_refine_ls_shift/su_max           0.000 
_refine_ls_shift/su_mean          0.000 
 
loop_ 
 _atom_site_label 
 _atom_site_type_symbol 
 _atom_site_fract_x 
 _atom_site_fract_y 
 _atom_site_fract_z 
 _atom_site_U_iso_or_equiv 
 _atom_site_adp_type 
 _atom_site_occupancy 
 _atom_site_symmetry_multiplicity 
 _atom_site_calc_flag 
 _atom_site_refinement_flags 
 _atom_site_disorder_assembly 
 _atom_site_disorder_group 
W1 W 0.39126(3) 0.07665(2) 0.42300(3) 0.01723(16) Uani 1 1 d U . . 
W2 W 0.5000 0.15366(5) 0.5000 0.0136(2) Uani 1 4 d SU . . 
W3 W 0.5000 0.0000 0.34565(5) 0.0226(3) Uani 1 4 d SU . . 
P1 P 0.5000 0.0000 0.5000 0.0127(18) Uani 1 8 d SU . . 
O1 O 0.4676(11) 0.0519(12) 0.5000 0.0168(18) Uiso 0.50 2 d SPU . 1 
O1' O 0.4573(12) 0.0000 0.4459(11) 0.016(2) Uiso 0.50 2 d SPU . 2 
O2 O 0.3646(7) 0.0801(6) 0.5000 0.023(2) Uani 1 2 d SU . . 
O3 O 0.4432(5) 0.1380(5) 0.4436(4) 0.0241(17) Uani 1 1 d U . . 
O4 O 0.5000 0.2238(9) 0.5000 0.029(5) Uani 1 4 d SU . . 
O5 O 0.5000 0.0000 0.2721(9) 0.025(3) Uani 1 4 d SU . . 
O6 O 0.3390(5) 0.1116(5) 0.3886(5) 0.040(3) Uani 1 1 d U . . 
O8 O 0.4569(9) 0.0562(9) 0.3747(9) 0.020(2) Uiso 0.50 1 d PU . 1 
O7 O 0.3776(13) 0.0000 0.4314(12) 0.018(2) Uiso 0.50 2 d SPU . 1 
O8' O 0.4357(9) 0.0595(9) 0.3550(9) 0.020(2) Uiso 0.50 1 d PU . 2 
O7' O 0.3507(12) 0.0000 0.4097(12) 0.016(3) Uiso 0.50 2 d SPU . 2 
Ni1 Ni 0.2500 0.2500 0.2500 0.0103(8) Uani 1 6 d SU . . 
O9 O 0.2092(4) 0.2756(4) 0.1765(4) 0.0148(15) Uani 1 1 d U . . 
N1 N 0.1508(5) 0.2773(5) 0.1764(5) 0.0132(16) Uani 1 1 d U . . 
C1 C 0.1237(6) 0.2468(6) 0.1372(6) 0.0151(17) Uani 1 1 d U . . 
H1A H 0.1442 0.2247 0.1107 0.018 Uiso 1 1 calc R . . 
C2 C 0.0646(6) 0.2483(6) 0.1358(6) 0.0172(19) Uani 1 1 d U . . 
H2A H 0.0454 0.2245 0.1097 0.021 Uiso 1 1 calc R . . 
C3 C 0.0325(5) 0.2832(6) 0.1713(6) 0.0118(18) Uani 1 1 d U . . 
C4 C 0.0639(5) 0.3169(6) 0.2097(6) 0.0110(18) Uani 1 1 d U . . 
H4A H 0.0440 0.3414 0.2347 0.013 Uiso 1 1 calc R . . 
C5 C 0.1248(6) 0.3154(6) 0.2124(6) 0.0127(17) Uani 1 1 d U . . 
H5A H 0.1458 0.3390 0.2373 0.015 Uiso 1 1 calc R . . 
O1W O 0.6056(12) 0.3342(12) 0.5000 0.077(4) Uani 1 2 d SU . . 
O3W O 0.5000 0.353(3) 0.463(3) 0.10(2) Uiso 0.50 2 d SP . . 
O4W O 0.5000 0.5000 0.5000 0.23(9) Uiso 1 24 d S . . 
O2W O 0.6009(7) 0.3991(7) 0.3991(7) 0.056(7) Uani 1 3 d S . . 
C7 C 0.7530(11) 0.1552(14) 0.5000 0.053(9) Uani 1 2 d S . . 
H7C H 0.7768 0.1584 0.5339 0.063 Uiso 0.50 1 d PR . . 
H7A H 0.7339 0.1184 0.5000 0.063 Uiso 1 2 d SR . . 
C6 C 0.7116(11) 0.1981(11) 0.5000 0.035(6) Uani 1 2 d S . . 
N2 N 0.6743(14) 0.2362(10) 0.5000 0.055(8) Uani 1 2 d S . . 
 
loop_ 
 _atom_site_aniso_label 
 _atom_site_aniso_U_11 
 _atom_site_aniso_U_22 
 _atom_site_aniso_U_33 
 _atom_site_aniso_U_23 
 _atom_site_aniso_U_13 
 _atom_site_aniso_U_12 
W1 0.0183(3) 0.0155(3) 0.0178(3) 0.0079(2) 0.0027(2) 0.0068(2) 
W2 0.0204(5) 0.0052(4) 0.0152(5) 0.000 0.000 0.000 
W3 0.0427(7) 0.0175(6) 0.0074(5) 0.000 0.000 0.000 
P1 0.014(3) 0.013(3) 0.012(3) 0.000 0.000 0.000 
O2 0.025(4) 0.023(4) 0.021(4) 0.000 0.000 -0.005(4) 
O3 0.024(3) 0.031(3) 0.018(3) 0.005(3) 0.006(3) -0.004(3) 
O4 0.061(11) 0.010(8) 0.016(8) 0.000 0.000 0.000 
O5 0.027(4) 0.026(4) 0.022(4) 0.000 0.000 0.000 
O6 0.038(6) 0.045(6) 0.038(6) 0.030(5) -0.024(5) -0.010(6) 
Ni1 0.0103(8) 0.0103(8) 0.0103(8) 0.0025(9) 0.0025(9) 0.0025(9) 
O9 0.015(3) 0.018(3) 0.011(3) 0.006(3) 0.003(3) -0.001(3) 
N1 0.011(3) 0.017(3) 0.011(3) 0.006(3) 0.000(3) 0.001(3) 
C1 0.013(3) 0.017(3) 0.016(3) 0.003(3) 0.000(3) 0.001(3) 
C2 0.015(3) 0.019(3) 0.018(3) -0.001(3) -0.001(3) 0.001(3) 
C3 0.008(3) 0.012(3) 0.015(3) 0.004(3) -0.001(3) -0.001(3) 
C4 0.008(3) 0.014(3) 0.011(3) 0.002(3) -0.001(3) 0.003(3) 
C5 0.010(3) 0.014(3) 0.013(3) 0.003(3) 0.000(3) 0.000(3) 
O1W 0.078(5) 0.075(5) 0.077(5) 0.000 0.000 0.002(4) 
O2W 0.056(7) 0.056(7) 0.056(7) 0.014(9) -0.014(9) -0.014(9) 
C7 0.022(12) 0.07(2) 0.07(2) 0.000 0.000 -0.026(13) 
C6 0.043(13) 0.042(13) 0.020(11) 0.000 0.000 -0.037(11) 
N2 0.11(2) 0.037(12) 0.016(10) 0.000 0.000 0.028(14) 
 
_geom_special_details 
; 
 All esds (except the esd in the dihedral angle between two l.s. planes) 
 are estimated using the full covariance matrix.  The cell esds are taken 
 into account individually in the estimation of esds in distances, angles 
 and torsion angles; correlations between esds in cell parameters are only 
 used when they are defined by crystal symmetry.  An approximate (isotropic) 
 treatment of cell esds is used for estimating esds involving l.s. planes. 
; 
 
loop_ 
 _geom_bond_atom_site_label_1 
 _geom_bond_atom_site_label_2 
 _geom_bond_distance 
 _geom_bond_site_symmetry_2 
 _geom_bond_publ_flag 
W1 O6 1.657(12) . ? 
W1 O7 1.811(6) . ? 
W1 O2 1.887(5) . ? 
W1 O8' 1.92(2) . ? 
W1 O3 1.920(11) . ? 
W1 O8 1.94(2) . ? 
W1 O7' 2.029(14) . ? 
W1 O1' 2.400(18) . ? 
W2 O4 1.62(2) . ? 
W2 O3 1.887(11) 26_556 ? 
W2 O3 1.887(11) . ? 
W2 O3 1.887(11) 3_656 ? 
W2 O3 1.887(11) 28_655 ? 
W2 O1 2.47(3) . ? 
W2 O1 2.47(3) 3_656 ? 
W3 O5 1.70(2) . ? 
W3 O8 1.77(2) 27 ? 
W3 O8 1.77(2) . ? 
W3 O8 1.77(2) 28_655 ? 
W3 O8 1.77(2) 2_655 ? 
W3 O8' 2.04(2) 27 ? 
W3 O8' 2.04(2) . ? 
W3 O8' 2.04(2) 28_655 ? 
W3 O8' 2.04(2) 2_655 ? 
W3 O1' 2.52(3) 2_655 ? 
W3 O1' 2.52(3) . ? 
P1 O1 1.41(3) 27 ? 
P1 O1 1.41(3) . ? 
P1 O1 1.41(3) 3_656 ? 
P1 O1 1.41(3) 25_656 ? 
P1 O1' 1.59(3) 26_556 ? 
P1 O1' 1.59(3) . ? 
P1 O1' 1.59(3) 25_656 ? 
P1 O1' 1.59(3) 2_655 ? 
O1 O1 1.50(5) 3_656 ? 
O1' W1 2.400(18) 27 ? 
O2 W1 1.887(5) 26_556 ? 
O7 W1 1.811(6) 27 ? 
O7' W1 2.029(14) 27 ? 
Ni1 O9 2.032(9) 5 ? 
Ni1 O9 2.032(9) 45 ? 
Ni1 O9 2.032(9) . ? 
Ni1 O9 2.032(9) 9 ? 
Ni1 O9 2.032(9) 37 ? 
Ni1 O9 2.032(9) 41 ? 
O9 N1 1.353(14) . ? 
N1 C1 1.308(18) . ? 
N1 C5 1.354(17) . ? 
C1 C2 1.368(19) . ? 
C1 H1A 0.9300 . ? 
C2 C3 1.370(19) . ? 
C2 H2A 0.9300 . ? 
C3 C4 1.387(19) . ? 
C3 C3 1.50(2) 28 ? 
C4 C5 1.412(18) . ? 
C4 H4A 0.9300 . ? 
C5 H5A 0.9300 . ? 
O3W O3W 1.72(13) 26_556 ? 
C7 C6 1.38(4) . ? 
C7 H7C 0.9592 . ? 
C7 H7A 0.9590 . ? 
C6 N2 1.23(4) . ? 
 
loop_ 
 _geom_angle_atom_site_label_1 
 _geom_angle_atom_site_label_2 
 _geom_angle_atom_site_label_3 
 _geom_angle 
 _geom_angle_site_symmetry_1 
 _geom_angle_site_symmetry_3 
 _geom_angle_publ_flag 
O6 W1 O7 113.7(10) . . ? 
O6 W1 O2 101.2(6) . . ? 
O7 W1 O2 83.3(10) . . ? 
O6 W1 O8' 95.6(8) . . ? 
O7 W1 O8' 88.8(11) . . ? 
O2 W1 O8' 163.2(8) . . ? 
O6 W1 O3 102.4(5) . . ? 
O7 W1 O3 143.7(10) . . ? 
O2 W1 O3 86.5(5) . . ? 
O8' W1 O3 91.2(7) . . ? 
O6 W1 O8 114.4(8) . . ? 
O7 W1 O8 87.7(11) . . ? 
O2 W1 O8 144.0(8) . . ? 
O8' W1 O8 20.1(8) . . ? 
O3 W1 O8 80.4(7) . . ? 
O6 W1 O7' 90.9(8) . . ? 
O7 W1 O7' 23.1(10) . . ? 
O2 W1 O7' 91.7(9) . . ? 
O8' W1 O7' 86.7(10) . . ? 
O3 W1 O7' 166.6(8) . . ? 
O8 W1 O7' 93.5(10) . . ? 
O6 W1 O1' 158.5(7) . . ? 
O7 W1 O1' 50.5(10) . . ? 
O2 W1 O1' 91.8(8) . . ? 
O8' W1 O1' 71.8(9) . . ? 
O3 W1 O1' 95.3(6) . . ? 
O8 W1 O1' 56.6(9) . . ? 
O7' W1 O1' 71.5(9) . . ? 
O4 W2 O3 101.1(3) . 26_556 ? 
O4 W2 O3 101.1(3) . . ? 
O3 W2 O3 87.5(6) 26_556 . ? 
O4 W2 O3 101.1(3) . 3_656 ? 
O3 W2 O3 88.2(6) 26_556 3_656 ? 
O3 W2 O3 157.9(7) . 3_656 ? 
O4 W2 O3 101.1(3) . 28_655 ? 
O3 W2 O3 157.9(7) 26_556 28_655 ? 
O3 W2 O3 88.2(6) . 28_655 ? 
O3 W2 O3 87.5(6) 3_656 28_655 ? 
O4 W2 O1 162.3(6) . . ? 
O3 W2 O1 66.8(5) 26_556 . ? 
O3 W2 O1 66.8(5) . . ? 
O3 W2 O1 91.6(6) 3_656 . ? 
O3 W2 O1 91.6(6) 28_655 . ? 
O4 W2 O1 162.3(6) . 3_656 ? 
O3 W2 O1 91.6(6) 26_556 3_656 ? 
O3 W2 O1 91.6(6) . 3_656 ? 
O3 W2 O1 66.8(5) 3_656 3_656 ? 
O3 W2 O1 66.8(5) 28_655 3_656 ? 
O1 W2 O1 35.3(12) . 3_656 ? 
O5 W3 O8 112.3(7) . 27 ? 
O5 W3 O8 112.3(7) . . ? 
O8 W3 O8 94.5(13) 27 . ? 
O5 W3 O8 112.3(7) . 28_655 ? 
O8 W3 O8 135.4(14) 27 28_655 ? 
O8 W3 O8 68.6(13) . 28_655 ? 
O5 W3 O8 112.3(7) . 2_655 ? 
O8 W3 O8 68.6(13) 27 2_655 ? 
O8 W3 O8 135.4(14) . 2_655 ? 
O8 W3 O8 94.5(13) 28_655 2_655 ? 
O5 W3 O8' 96.1(6) . 27 ? 
O8 W3 O8' 18.7(8) 27 27 ? 
O8 W3 O8' 92.5(8) . 27 ? 
O8 W3 O8' 150.1(10) 28_655 27 ? 
O8 W3 O8' 82.8(9) 2_655 27 ? 
O5 W3 O8' 96.1(6) . . ? 
O8 W3 O8' 92.5(8) 27 . ? 
O8 W3 O8' 18.7(8) . . ? 
O8 W3 O8' 82.8(9) 28_655 . ? 
O8 W3 O8' 150.1(10) 2_655 . ? 
O8' W3 O8' 84.9(12) 27 . ? 
O5 W3 O8' 96.1(6) . 28_655 ? 
O8 W3 O8' 150.1(10) 27 28_655 ? 
O8 W3 O8' 82.8(9) . 28_655 ? 
O8 W3 O8' 18.7(8) 28_655 28_655 ? 
O8 W3 O8' 92.5(8) 2_655 28_655 ? 
O8' W3 O8' 167.8(12) 27 28_655 ? 
O8' W3 O8' 93.8(12) . 28_655 ? 
O5 W3 O8' 96.1(6) . 2_655 ? 
O8 W3 O8' 82.8(9) 27 2_655 ? 
O8 W3 O8' 150.1(10) . 2_655 ? 
O8 W3 O8' 92.5(8) 28_655 2_655 ? 
O8 W3 O8' 18.7(8) 2_655 2_655 ? 
O8' W3 O8' 93.8(12) 27 2_655 ? 
O8' W3 O8' 167.8(12) . 2_655 ? 
O8' W3 O8' 84.9(12) 28_655 2_655 ? 
O5 W3 O1' 156.9(6) . 2_655 ? 
O8 W3 O1' 82.6(8) 27 2_655 ? 
O8 W3 O1' 82.6(8) . 2_655 ? 
O8 W3 O1' 55.3(7) 28_655 2_655 ? 
O8 W3 O1' 55.3(7) 2_655 2_655 ? 
O8' W3 O1' 100.9(8) 27 2_655 ? 
O8' W3 O1' 100.9(8) . 2_655 ? 
O8' W3 O1' 67.5(7) 28_655 2_655 ? 
O8' W3 O1' 67.5(7) 2_655 2_655 ? 
O5 W3 O1' 156.9(6) . . ? 
O8 W3 O1' 55.3(7) 27 . ? 
O8 W3 O1' 55.3(7) . . ? 
O8 W3 O1' 82.6(8) 28_655 . ? 
O8 W3 O1' 82.6(8) 2_655 . ? 
O8' W3 O1' 67.5(7) 27 . ? 
O8' W3 O1' 67.5(7) . . ? 
O8' W3 O1' 100.9(8) 28_655 . ? 
O8' W3 O1' 100.9(8) 2_655 . ? 
O1' W3 O1' 46.1(12) 2_655 . ? 
O1 P1 O1 116(2) 27 . ? 
O1 P1 O1 180.0(12) 27 3_656 ? 
O1 P1 O1 64(2) . 3_656 ? 
O1 P1 O1 64(2) 27 25_656 ? 
O1 P1 O1 180.000(7) . 25_656 ? 
O1 P1 O1 116(2) 3_656 25_656 ? 
O1 P1 O1' 70.9(7) 27 26_556 ? 
O1 P1 O1' 70.9(7) . 26_556 ? 
O1 P1 O1' 109.1(7) 3_656 26_556 ? 
O1 P1 O1' 109.1(7) 25_656 26_556 ? 
O1 P1 O1' 70.9(7) 27 . ? 
O1 P1 O1' 70.9(7) . . ? 
O1 P1 O1' 109.1(7) 3_656 . ? 
O1 P1 O1' 109.1(7) 25_656 . ? 
O1' P1 O1' 103.5(19) 26_556 . ? 
O1 P1 O1' 109.1(7) 27 25_656 ? 
O1 P1 O1' 109.1(7) . 25_656 ? 
O1 P1 O1' 70.9(7) 3_656 25_656 ? 
O1 P1 O1' 70.9(7) 25_656 25_656 ? 
O1' P1 O1' 76.5(19) 26_556 25_656 ? 
O1' P1 O1' 180.0(12) . 25_656 ? 
O1 P1 O1' 109.1(7) 27 2_655 ? 
O1 P1 O1' 109.1(7) . 2_655 ? 
O1 P1 O1' 70.9(7) 3_656 2_655 ? 
O1 P1 O1' 70.9(7) 25_656 2_655 ? 
O1' P1 O1' 180.000(5) 26_556 2_655 ? 
O1' P1 O1' 76.5(19) . 2_655 ? 
O1' P1 O1' 103.5(19) 25_656 2_655 ? 
P1 O1 O1 58.0(11) . 3_656 ? 
P1 O1 W2 130.4(15) . . ? 
O1 O1 W2 72.3(6) 3_656 . ? 
P1 O1' W1 124.6(8) . 27 ? 
P1 O1' W1 124.6(8) . . ? 
W1 O1' W1 95.2(10) 27 . ? 
P1 O1' W3 118.7(14) . . ? 
W1 O1' W3 92.7(8) 27 . ? 
W1 O1' W3 92.7(8) . . ? 
W1 O2 W1 141.5(9) . 26_556 ? 
W2 O3 W1 138.5(6) . . ? 
W3 O8 W1 146.8(12) . . ? 
W1 O7 W1 156.4(18) . 27 ? 
W1 O8' W3 128.1(11) . . ? 
W1 O7' W1 121.8(14) . 27 ? 
O9 Ni1 O9 90.5(4) 5 45 ? 
O9 Ni1 O9 89.5(4) 5 . ? 
O9 Ni1 O9 90.5(4) 45 . ? 
O9 Ni1 O9 89.5(4) 5 9 ? 
O9 Ni1 O9 180.0(5) 45 9 ? 
O9 Ni1 O9 89.5(4) . 9 ? 
O9 Ni1 O9 90.5(4) 5 37 ? 
O9 Ni1 O9 89.5(4) 45 37 ? 
O9 Ni1 O9 180.0(3) . 37 ? 
O9 Ni1 O9 90.5(4) 9 37 ? 
O9 Ni1 O9 180.0(5) 5 41 ? 
O9 Ni1 O9 89.5(4) 45 41 ? 
O9 Ni1 O9 90.5(4) . 41 ? 
O9 Ni1 O9 90.5(4) 9 41 ? 
O9 Ni1 O9 89.5(4) 37 41 ? 
N1 O9 Ni1 118.3(7) . . ? 
C1 N1 O9 117.7(11) . . ? 
C1 N1 C5 124.4(12) . . ? 
O9 N1 C5 117.4(11) . . ? 
N1 C1 C2 118.8(13) . . ? 
N1 C1 H1A 120.6 . . ? 
C2 C1 H1A 120.6 . . ? 
C1 C2 C3 122.8(13) . . ? 
C1 C2 H2A 118.6 . . ? 
C3 C2 H2A 118.6 . . ? 
C2 C3 C4 115.6(12) . . ? 
C2 C3 C3 122.8(8) . 28 ? 
C4 C3 C3 121.5(7) . 28 ? 
C3 C4 C5 122.5(12) . . ? 
C3 C4 H4A 118.8 . . ? 
C5 C4 H4A 118.8 . . ? 
N1 C5 C4 115.6(12) . . ? 
N1 C5 H5A 122.2 . . ? 
C4 C5 H5A 122.2 . . ? 
C6 C7 H7C 110.0 . . ? 
C6 C7 H7A 108.5 . . ? 
H7C C7 H7A 109.5 . . ? 
N2 C6 C7 180(3) . . ? 
 
_diffrn_measured_fraction_theta_max    1.000 
_diffrn_reflns_theta_full              27.48 
_diffrn_measured_fraction_theta_full   1.000 
_refine_diff_density_max    2.660 
_refine_diff_density_min   -7.033 
_refine_diff_density_rms    0.454 
